# Supplementary material
Source: publisher figshare collection journal article supplement (https://frontiersin.figshare.com/ndownloader/files/24264275)
Supplement: Supplementary file [file 24264275]

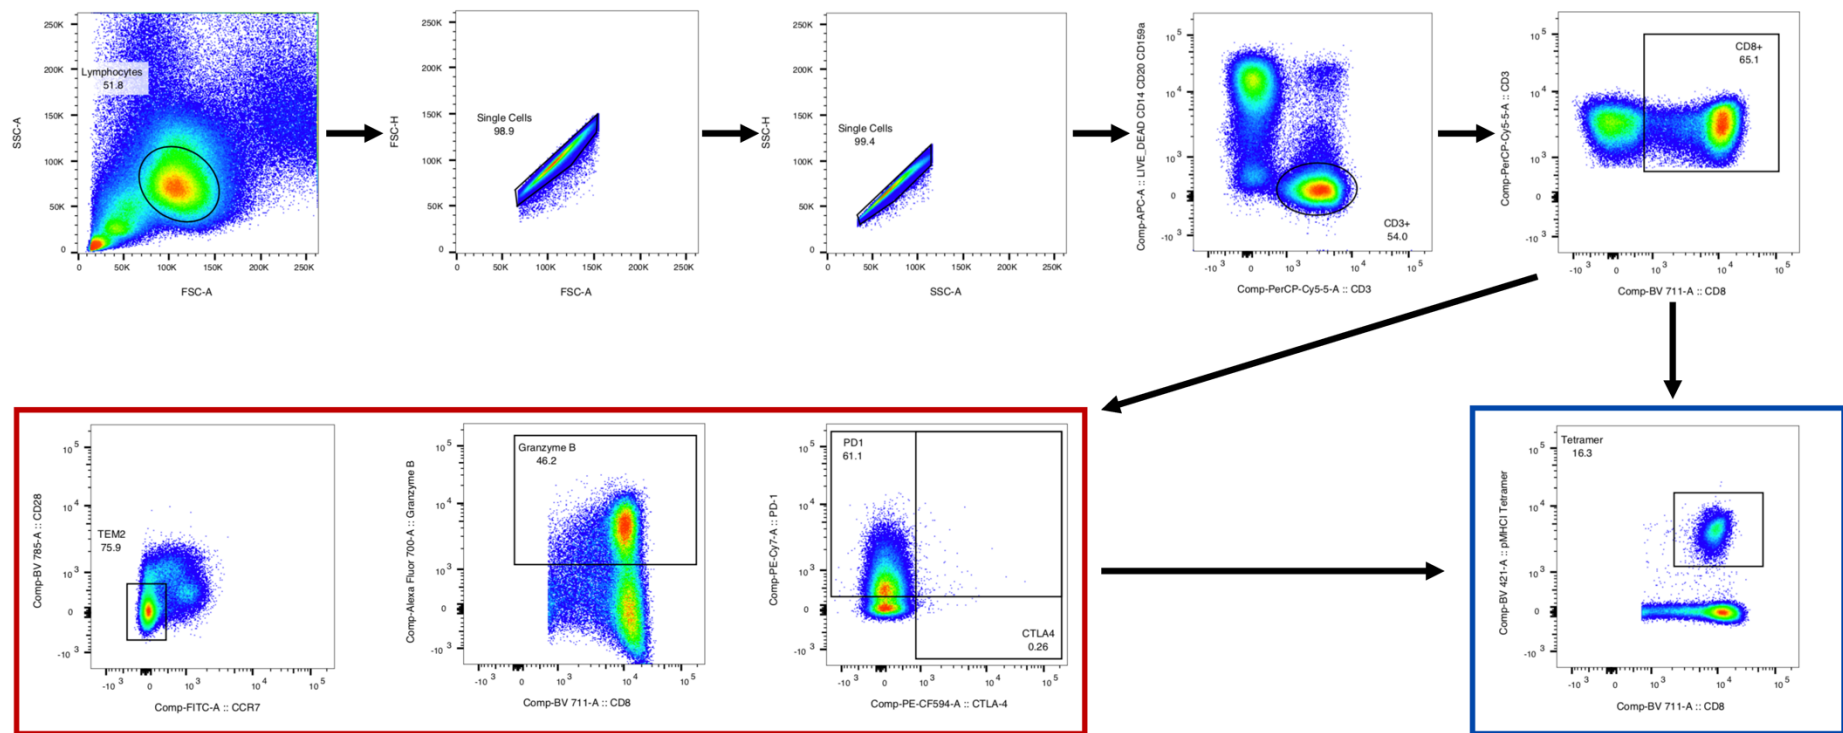

**Supplemental Figure 1. Flow cytometry gating strategy for resting PBMC pMHC tetramer staining.** Red boxes show gates which were defined based upon all CD3<sup>+</sup> CD8<sup>+</sup> T cells in the sample, then applied to the populations of interest boxed in blue (tetramer<sup>+</sup> CD8<sup>+</sup> T cells).

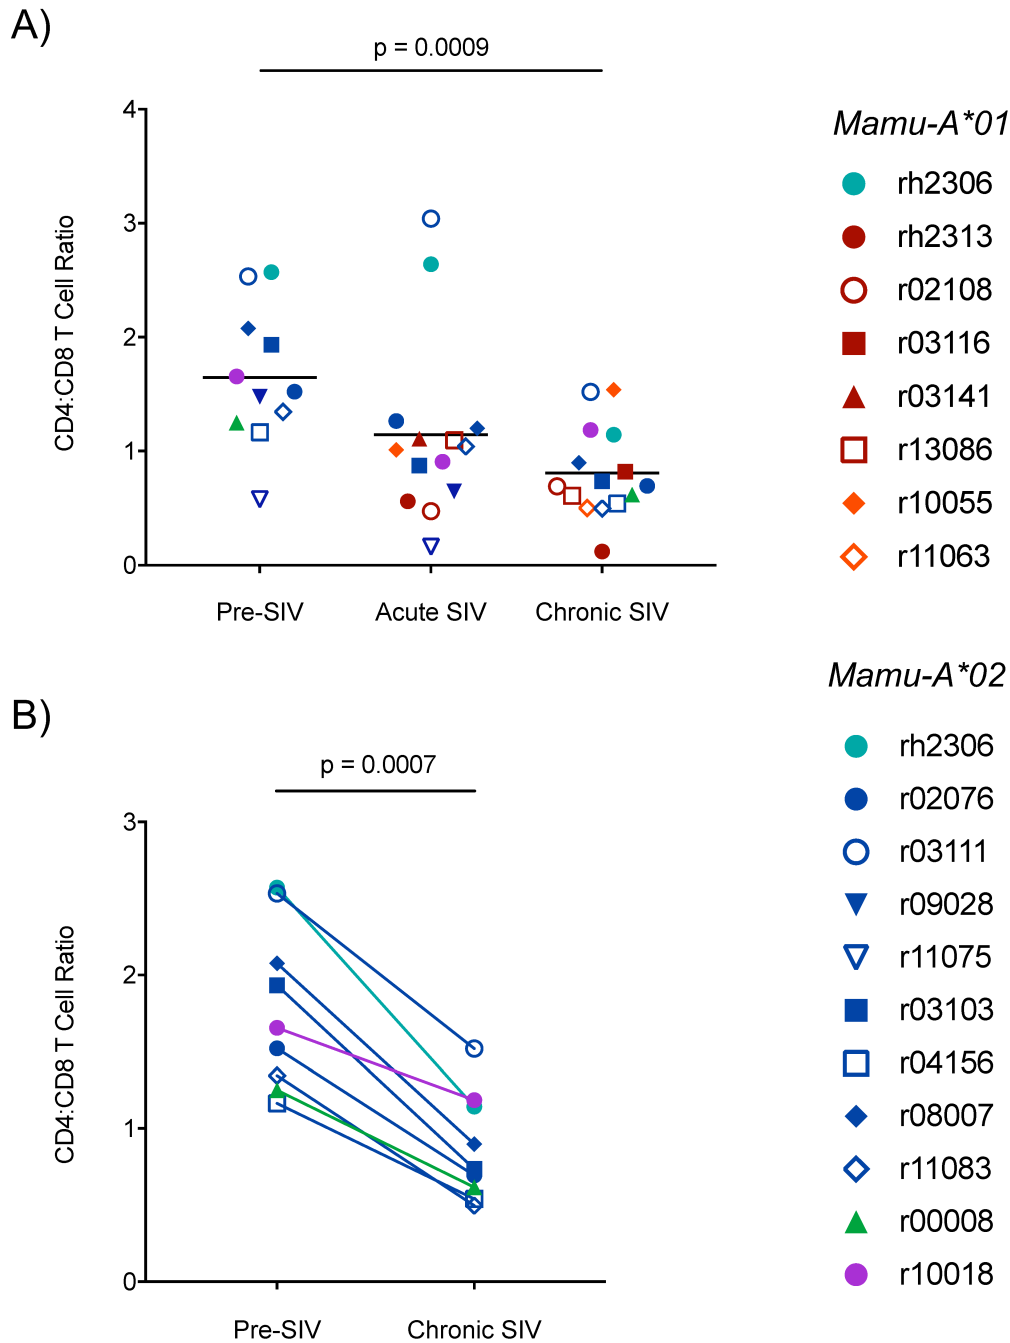

**Supplemental Figure 2. CD4:CD8 T cell ratios in SIV<sub>mac239</sub>-infected RMs.** (A) CD4:CD8 T cell ratios for RMs at pre-SIV, acute SIV, and chronic SIV timepoints. (B) CD4:CD8 T cell ratios for all RMs with both pre-SIV and chronic SIV timepoints. CD4:CD8 T cell ratios were determined by analysis of live CD3<sup>+</sup> CD14<sup>-</sup> CD20<sup>-</sup> CD159a<sup>-</sup> lymphocytes in resting PBMCs. Ratios were calculated using the following formula:  $(100 - \% \text{ of CD8}^+ \text{ cells among live CD3}^+ \text{ CD14}^- \text{ CD20}^- \text{ CD159a}^- \text{ lymphocytes}) / (\% \text{ of CD8}^+ \text{ cells among live CD3}^+ \text{ CD14}^- \text{ CD20}^- \text{ CD159a}^- \text{ lymphocytes})$ . Statistical significance was evaluated using Welch's t-test. In (A), the differences in the CD4:CD8 T cell ratio between the pre-SIV and acute SIV timepoints, and the acute SIV and chronic SIV timepoints, were not statistically significant ( $p > 0.05$ ).

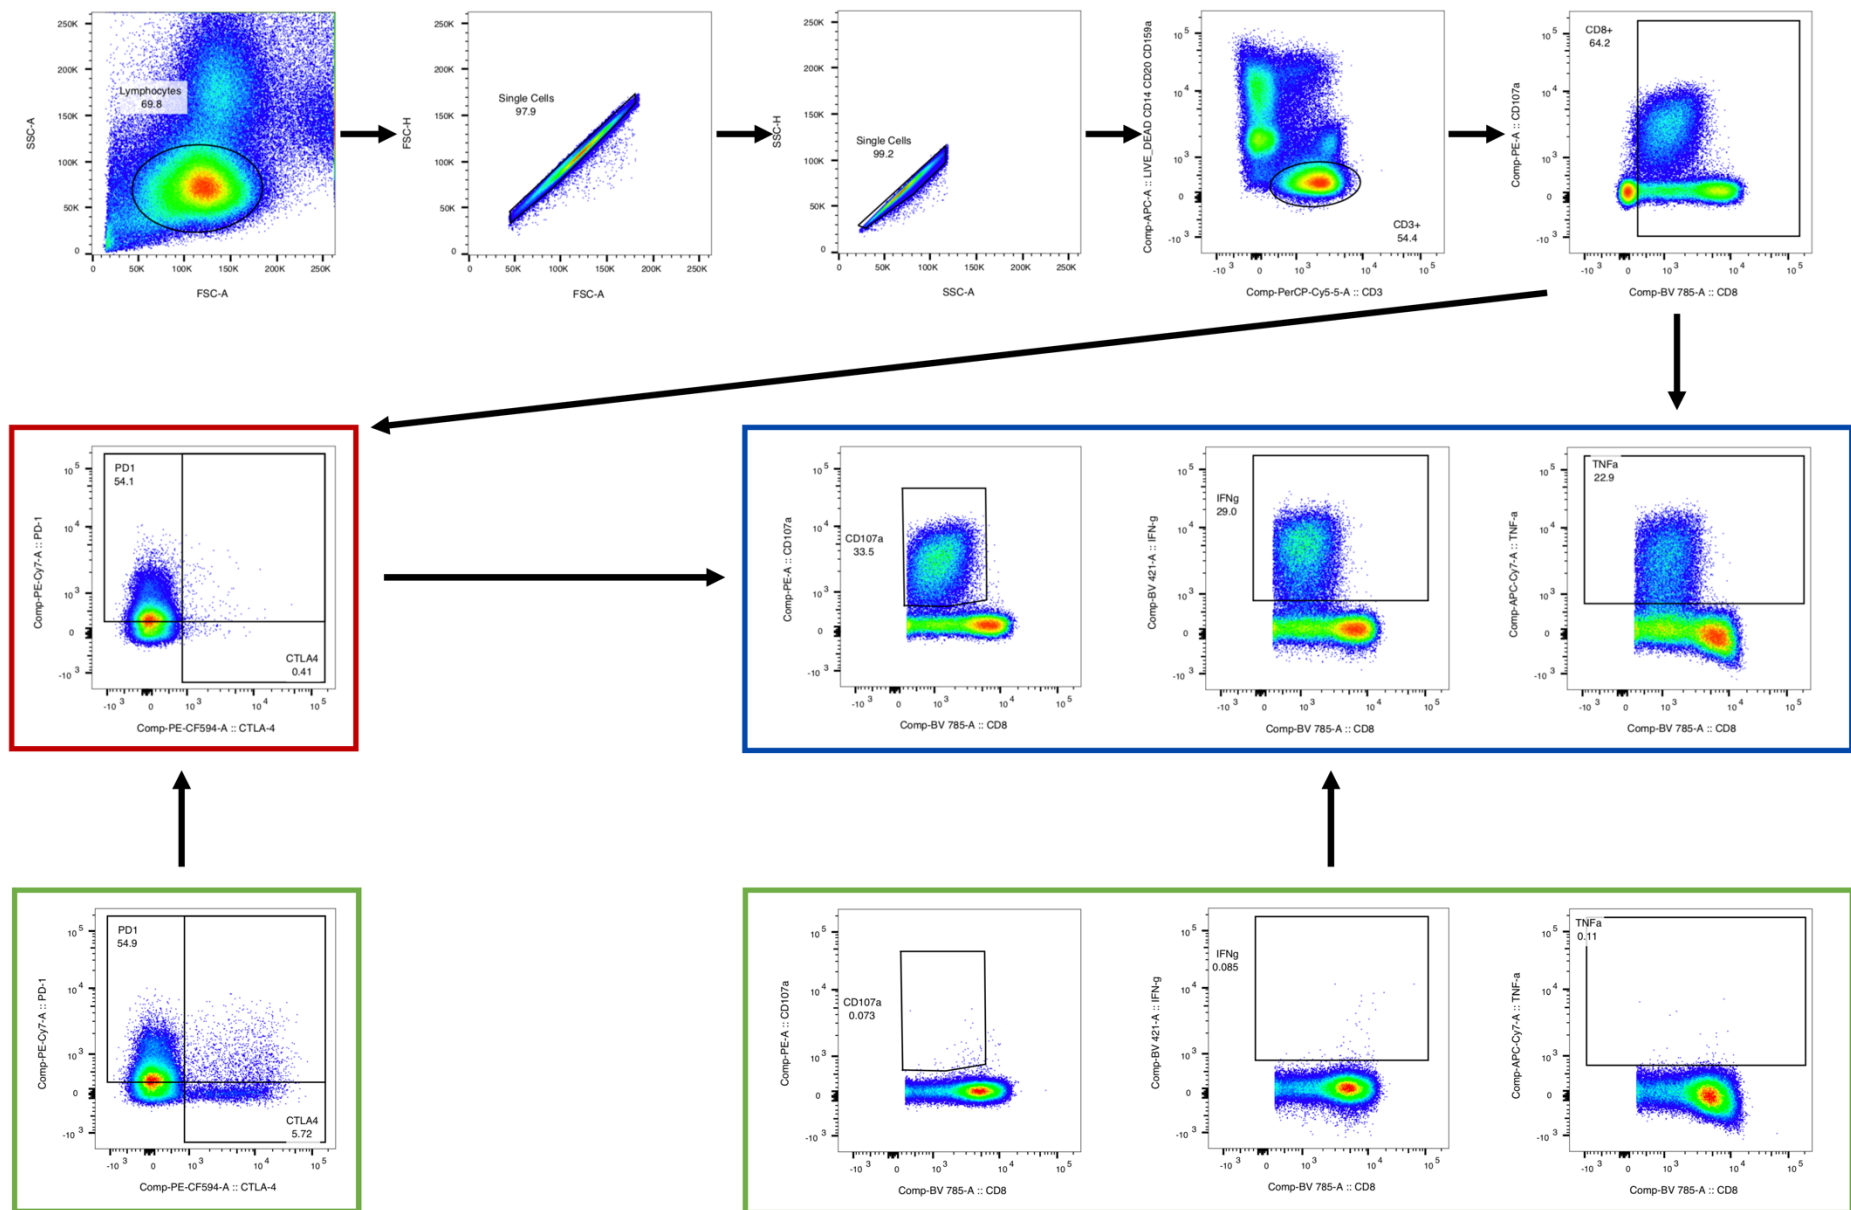

Positive control PBMCs  
(BD Leukocyte  
Activation Cocktail)

Negative control (unstimulated) PBMCs

**Supplemental Figure 3. Flow cytometry gating strategy for CD107a/ICS assays.** PD-1 and CTLA-4 gating was determined using PBMCs from the same animal stimulated with BD Leukocyte Activation Cocktail (positive control for T cell activation; green box at left). Gating for T cell effector function markers (CD107a, IFN- $\gamma$ , and TNF- $\alpha$ ) was determined using unstimulated PBMCs from the same animal (negative control for T cell activation; green box at right). Red box shows gate which was defined based upon all CD3<sup>+</sup> CD8<sup>+</sup> T cells in the sample, then applied to the populations of interest boxed in blue (responding CD8<sup>+</sup> T cells).

## A) Tetramer Frequencies

## B) CD107a/ICS Response Frequencies

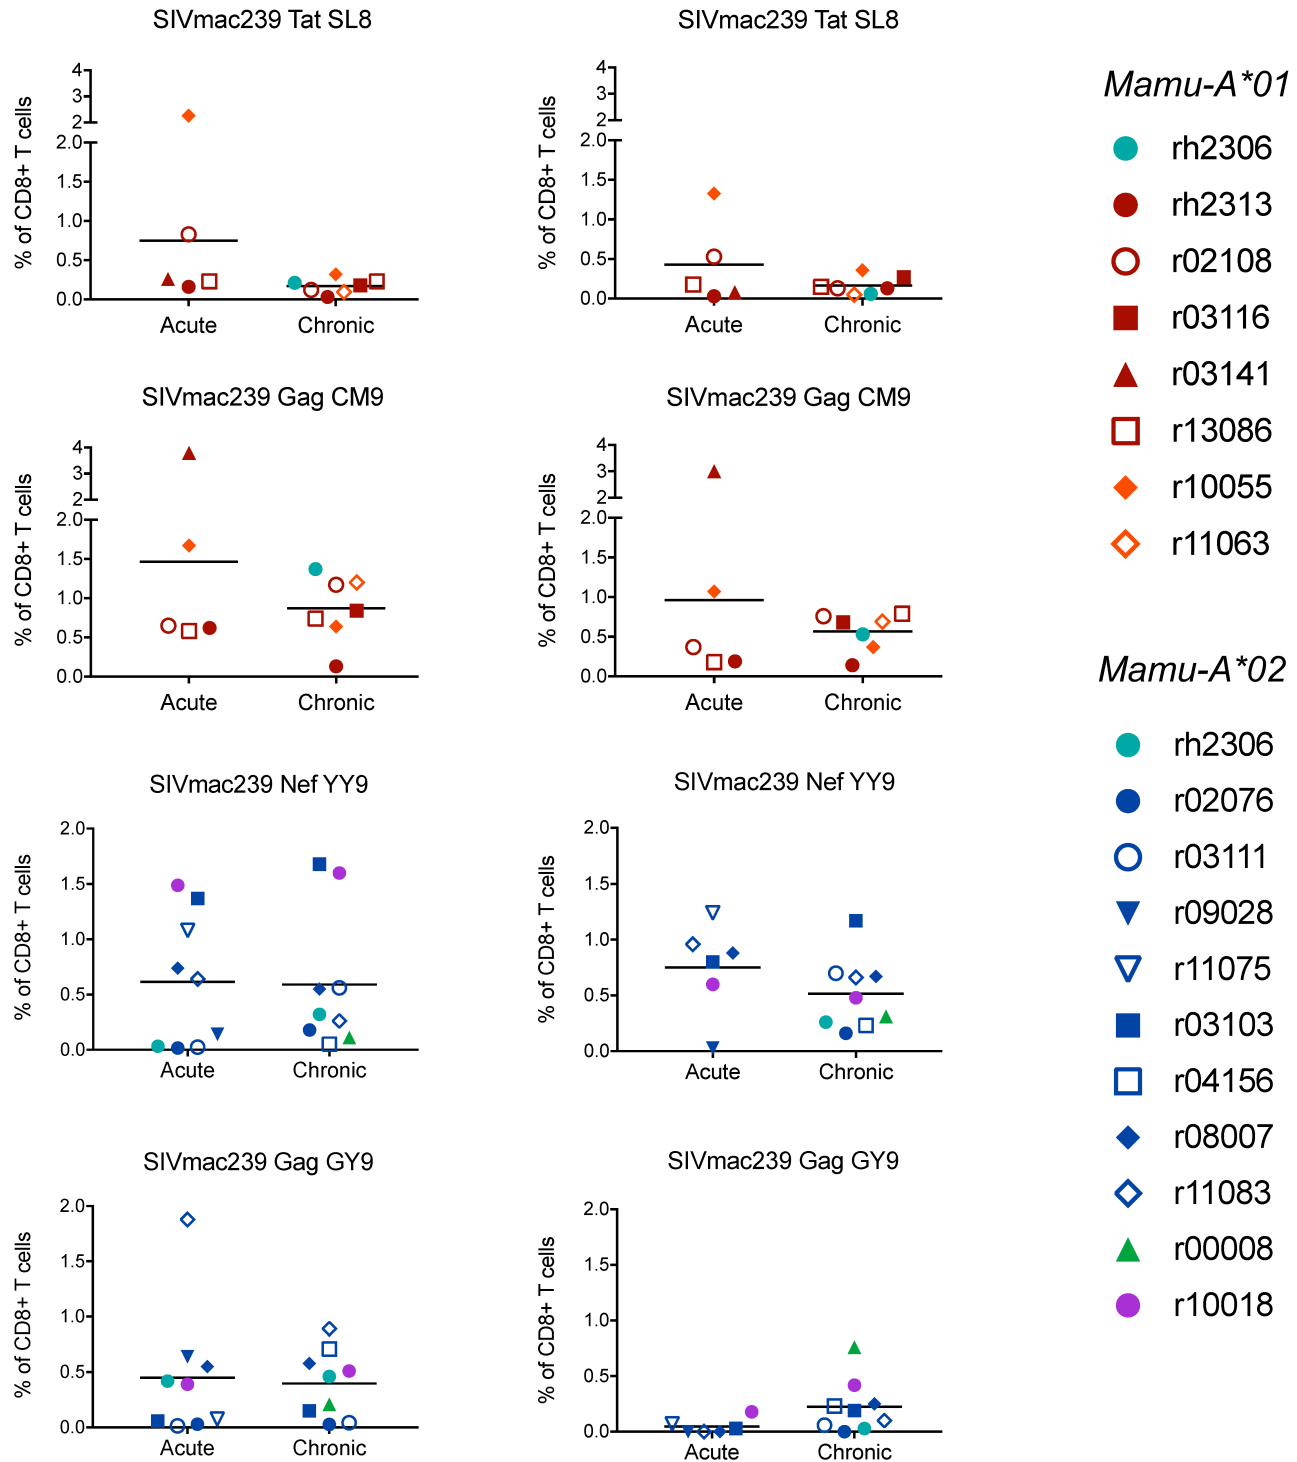

**Supplemental Figure 4. Frequencies of SIVmac239-specific CD8<sup>+</sup> CTLs during acute and chronic SIVmac239 infection.** PBMCs from SIVmac239-infected *Mamu-A\*01*<sup>+</sup> and *Mamu-A\*02*<sup>+</sup> animals were stained with (A) the indicated pMHC tetramers or (B) stimulated with the corresponding minimal optimal peptides in a CD107a degranulation assay with ICS. Graphs depict the frequencies of antigen-specific CD8<sup>+</sup> T cells among all CD8<sup>+</sup> T cells (defined as live CD3<sup>+</sup> CD8<sup>+</sup> CD14<sup>-</sup> CD20<sup>-</sup> CD159a<sup>-</sup> lymphocytes). None of the differences between acute- and chronic-phase CD8<sup>+</sup> T cells in panels A and B were statistically significant (all  $p > 0.05$ , Welch's  $t$ -test).

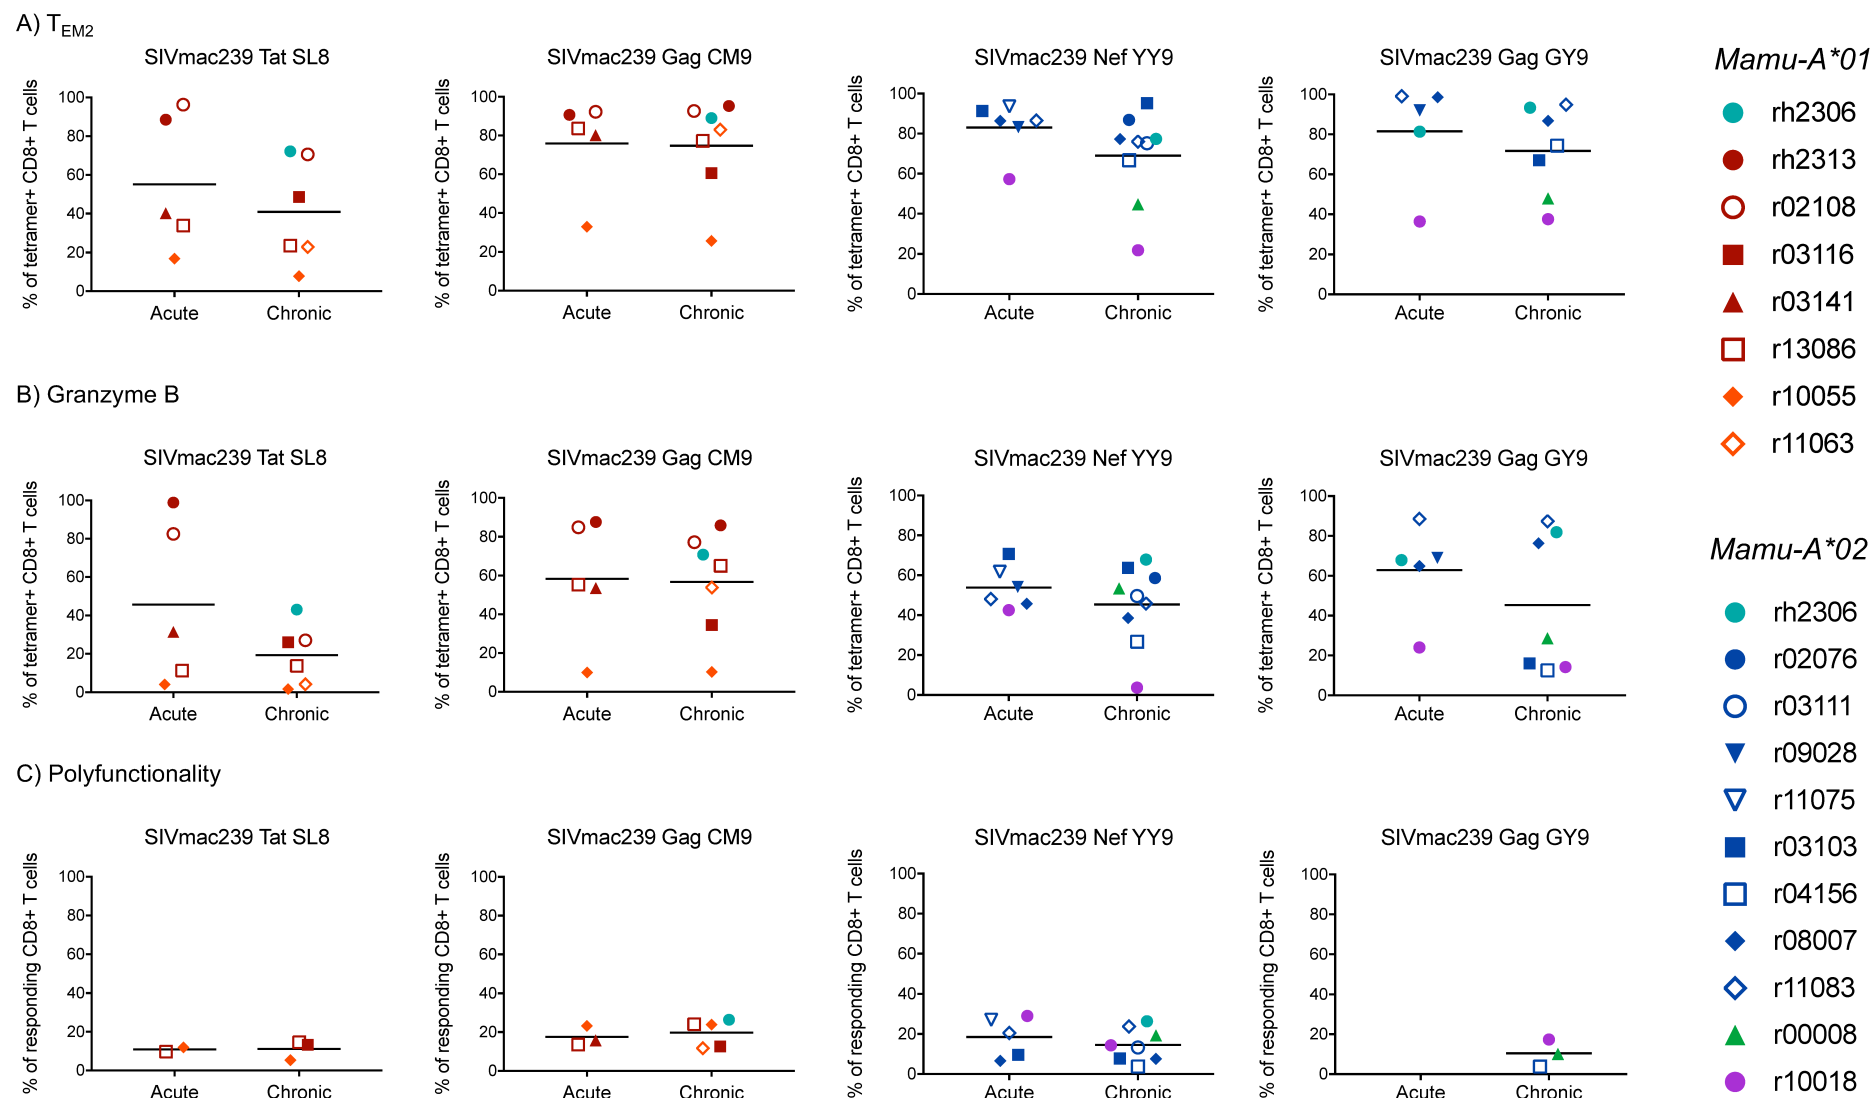

**Supplemental Figure 5. Functional characteristics of SIVmac239-specific CD8<sup>+</sup> T cells during acute and chronic SIVmac239 infection.** Graphs depict the frequencies of (A) T<sub>EM2</sub> (CD28<sup>-</sup> CCR7<sup>-</sup>) and (B) granzyme B<sup>+</sup> cells among tetramer<sup>+</sup> CD8<sup>+</sup> T cells (defined as live CD3<sup>+</sup> CD8<sup>+</sup> tetramer<sup>+</sup> CD14<sup>-</sup> CD20<sup>-</sup> CD159a<sup>-</sup> lymphocytes). (C) Frequencies of polyfunctional (CD107a<sup>+</sup> IFN- $\gamma$ <sup>+</sup> TNF- $\alpha$ <sup>+</sup>) CD8<sup>+</sup> T cells among CD8<sup>+</sup> T cells mounting any response (CD107a or IFN- $\gamma$  or TNF- $\alpha$ ) to minimal optimal peptide. In (C), none of the PBMC samples tested at the acute timepoint mounted a detectable response (at least a twofold greater response frequency than the unstimulated negative control) to SIVmac239 Gag GY9. None of the differences between acute and chronic timepoints were statistically significant (all  $p > 0.05$  by Welch's t-test).

## A) PD-1 Frequencies

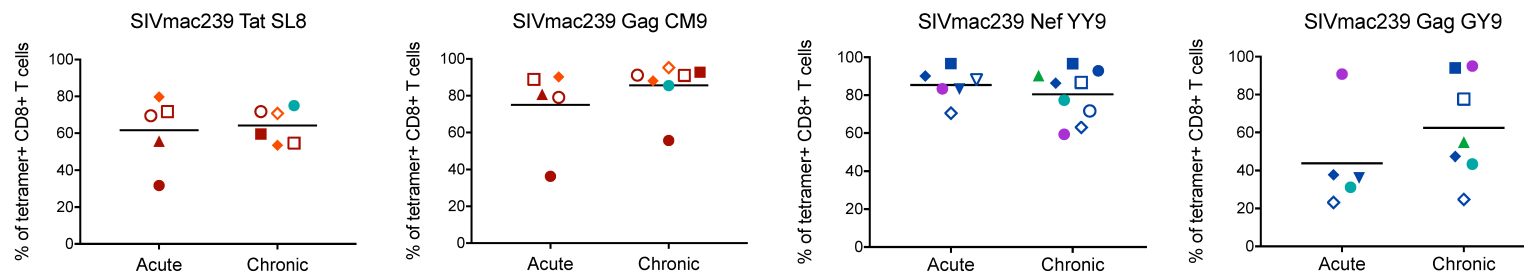

*Mamu-A\*01*

- rh2306
- rh2313
- r02108
- r03116
- ▲ r03141
- r13086
- ◆ r10055
- ◇ r11063

## B) PD-1 MFIs

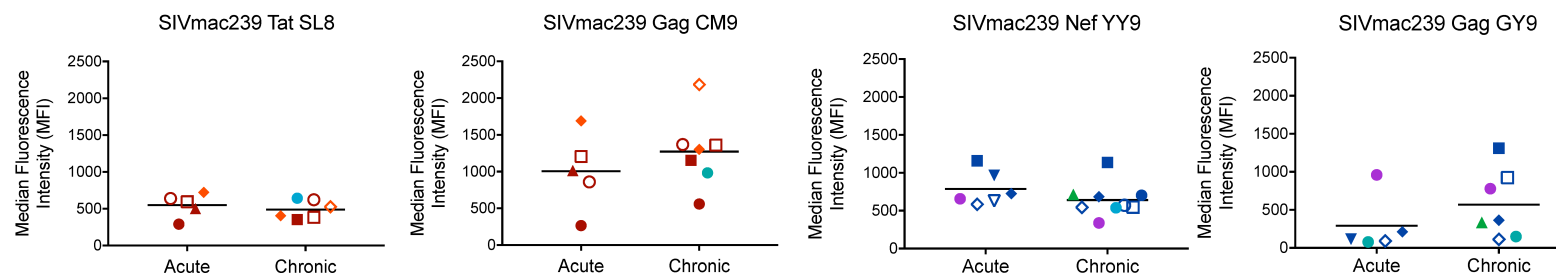

*Mamu-A\*02*

- rh2306
- r02076
- r03111
- ▼ r09028
- ▽ r11075
- r03103
- r04156
- ◆ r08007
- ◇ r11083
- ▲ r00008
- r10018

## C) CTLA-4 Frequencies

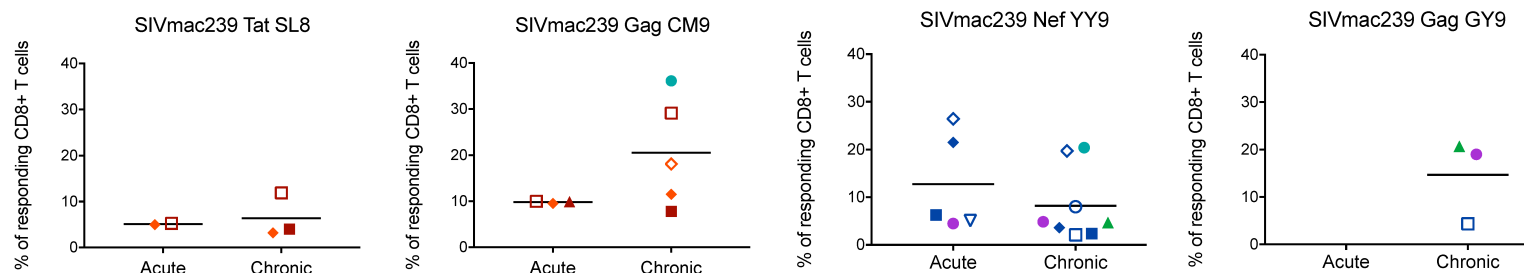

## D) CTLA-4 MFIs

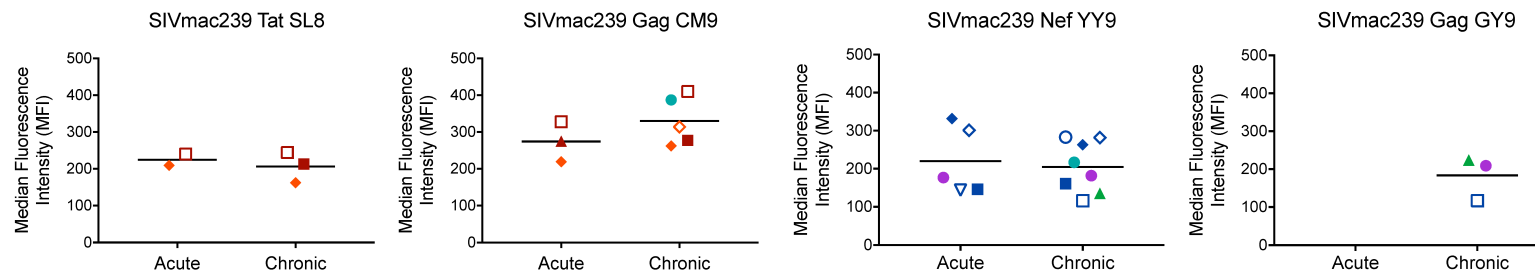

**Supplemental Figure 6. Exhaustion marker expression by SIVmac239-specific CD8<sup>+</sup> T cells during acute and chronic SIVmac239 infection.** (A) Frequencies of PD-1<sup>+</sup> cells among tetramer<sup>+</sup> CD8<sup>+</sup> T cells and (B) PD-1 median fluorescence intensities (MFIs) for tetramer<sup>+</sup> CD8<sup>+</sup> T cells (defined as live CD3<sup>+</sup> CD8<sup>+</sup> tetramer<sup>+</sup> CD14<sup>-</sup> CD20<sup>-</sup> CD159a<sup>-</sup> lymphocytes). (C) Frequencies of CTLA-4<sup>+</sup> cells among responding CD8<sup>+</sup> T cells and (D) CTLA-4 MFIs for responding CD8<sup>+</sup> T cells (defined as live CD3<sup>+</sup> CD8<sup>+</sup> tetramer<sup>+</sup> CD14<sup>-</sup> CD20<sup>-</sup> CD159a<sup>-</sup> lymphocytes mounting any response to minimal optimal peptide (CD107a<sup>+</sup> or IFN- $\gamma$ <sup>+</sup> or TNF- $\alpha$ <sup>+</sup>)). In (C) and (D), none of the PBMC samples tested at the acute timepoint mounted a detectable response (at least a twofold greater response frequency than the unstimulated negative control) to SIVmac239 Gag GY9. None of the differences between acute and chronic timepoints were statistically significant (all  $p > 0.05$  by Welch's t-test).



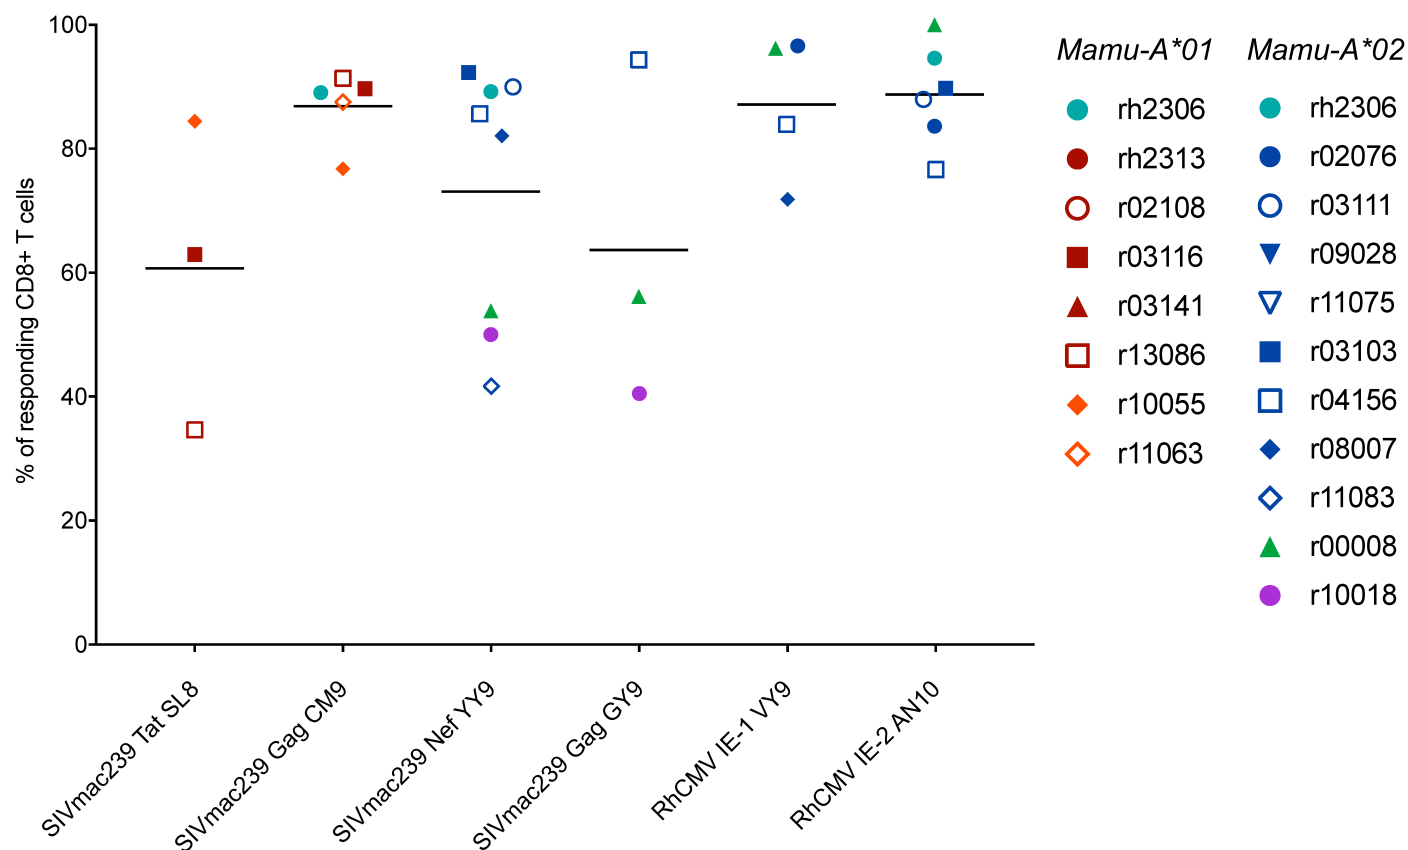

**Supplemental Figure 7. Frequencies of degranulating (CD107a<sup>+</sup>) lymphocytes among RhCMV- and SIVmac239-specific CD8<sup>+</sup> T cells during chronic SIVmac239 infection.** Graph depicts the frequencies of degranulating (CD107a<sup>+</sup>) lymphocytes among CD8<sup>+</sup> T cells responding to minimal optimal peptide in a CD107a/ICS assay. A responding CD8<sup>+</sup> T cell is defined as a live CD3<sup>+</sup> CD8<sup>+</sup> CD14<sup>-</sup> CD20<sup>-</sup> CD159a<sup>-</sup> lymphocyte staining positive for CD107a or IFN- $\gamma$  or TNF- $\alpha$ . Statistical significance was evaluated using Welch's t-test. None of the comparisons between RhCMV-specific and/or SIVmac239-specific CD8<sup>+</sup> T cell populations yielded statistically significant p-values (not shown on graph, all  $p > 0.05$ ).
